# Supplementary material for: Investigation of the stability of D5SIC-DNAM-incorporated DNA duplex in Taq polymerase binary system: a systematic classical MD approach
Source: Royal Society of Chemistry journal article supplement (doi:10.1039/d3cp05571j), 2024-01-01
Supplement: d3cp05571j2.pdf [file d3cp05571j2.pdf]

## Supporting Information

### Investigation of stability of D5SIC-DNAM-Incorporated DNA duplex in Taq Polymerase

#### Binary system: A Systematic Classical MD Approach

Tanay Debnath<sup>1</sup>, G. Andres Cisneros<sup>1,2</sup>

<sup>1</sup>Department of Physics, University of Texas at Dallas, Richardson, TX, USA

<sup>2</sup>Department of Chemistry and Biochemistry, University of Texas at Dallas, Richardson, TX, USA

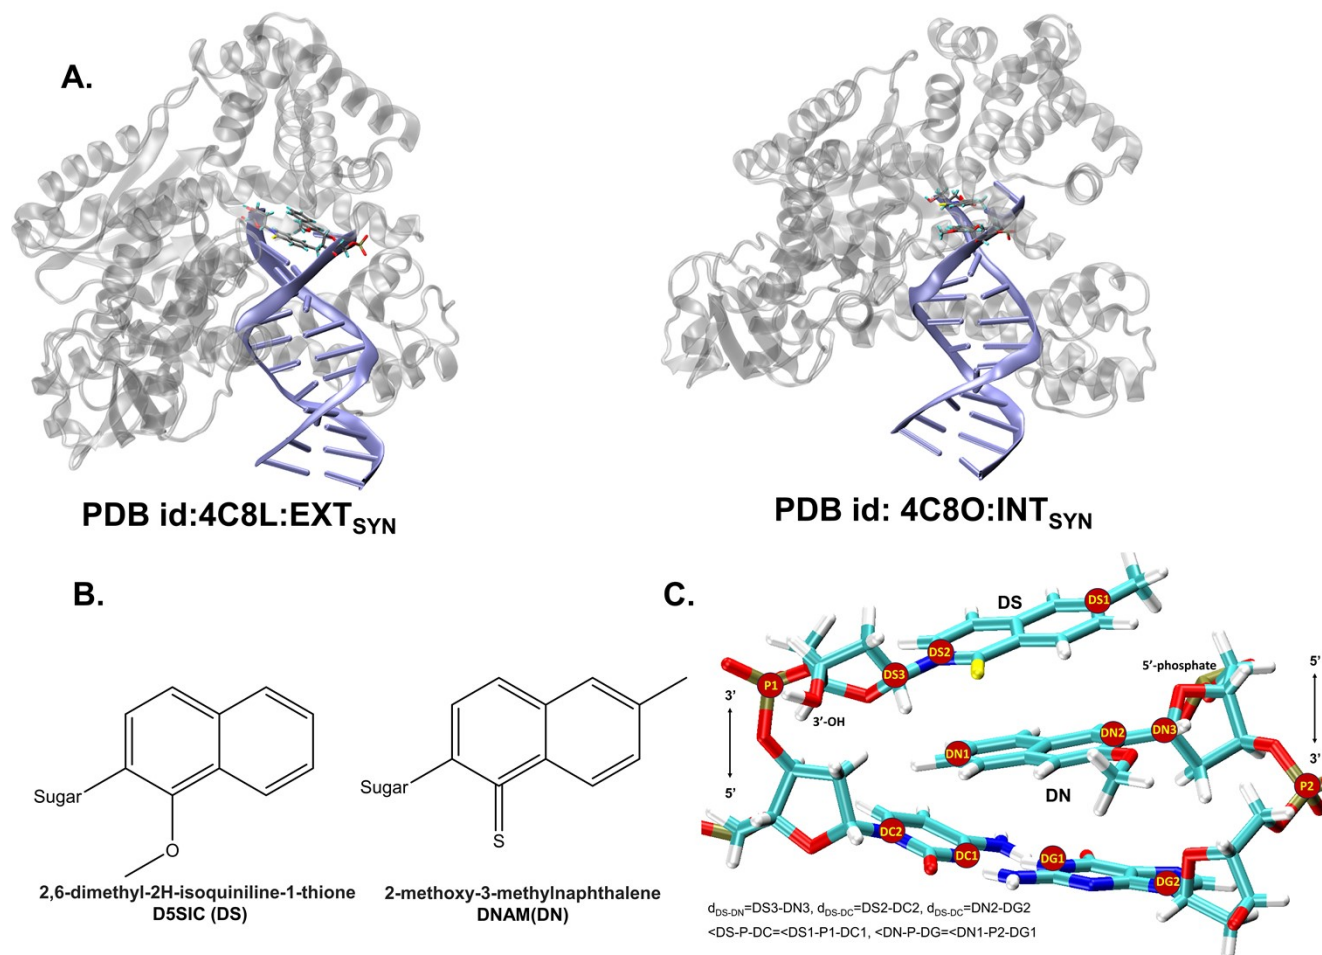

**Figure S1.** A. Crystal structure of EXT<sub>SYN</sub> and INT<sub>SYN</sub>, B. 2D representations of DS and DN, C. Schematic representation of distance and angles associated with UB and adjacent NB.

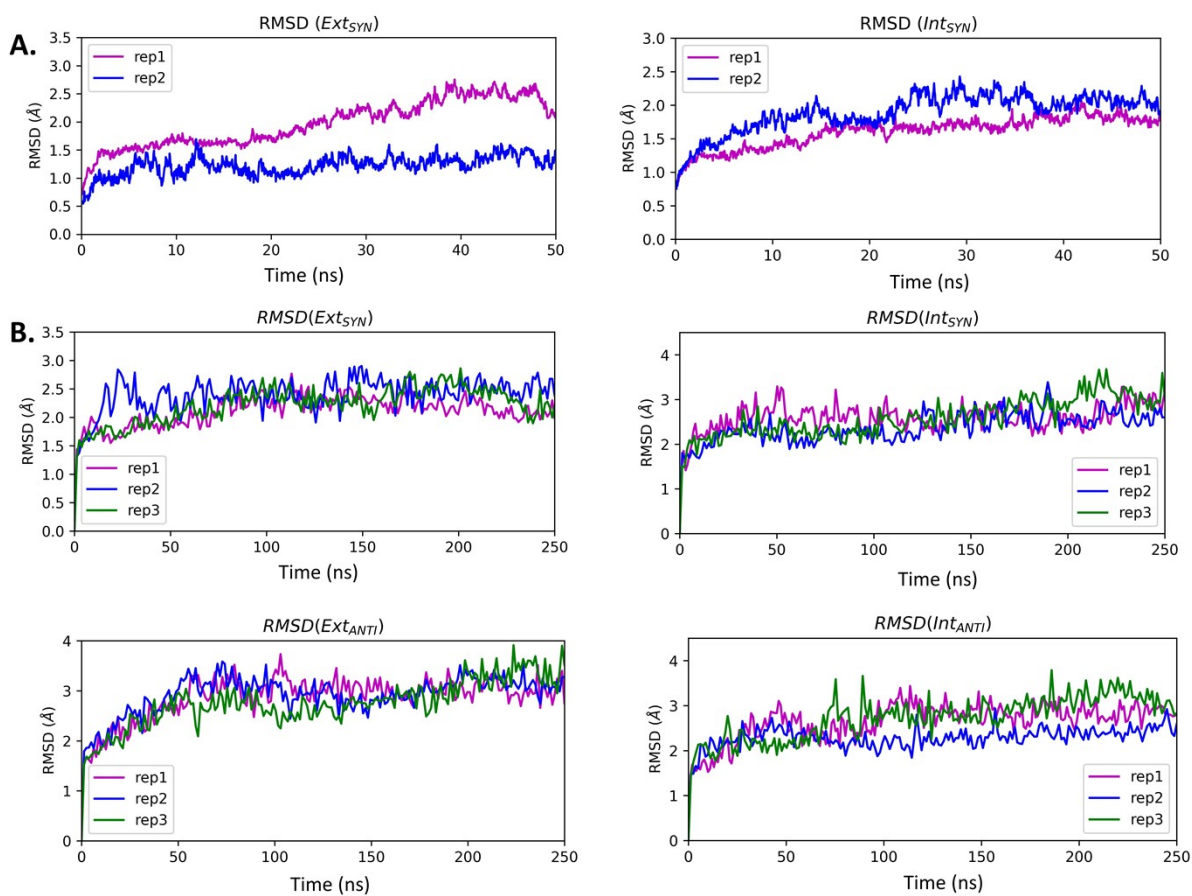

**Figure S2.** RMSD obtained from A. AMOEBA and B. AMBER force field mediated simulations for all the systems.

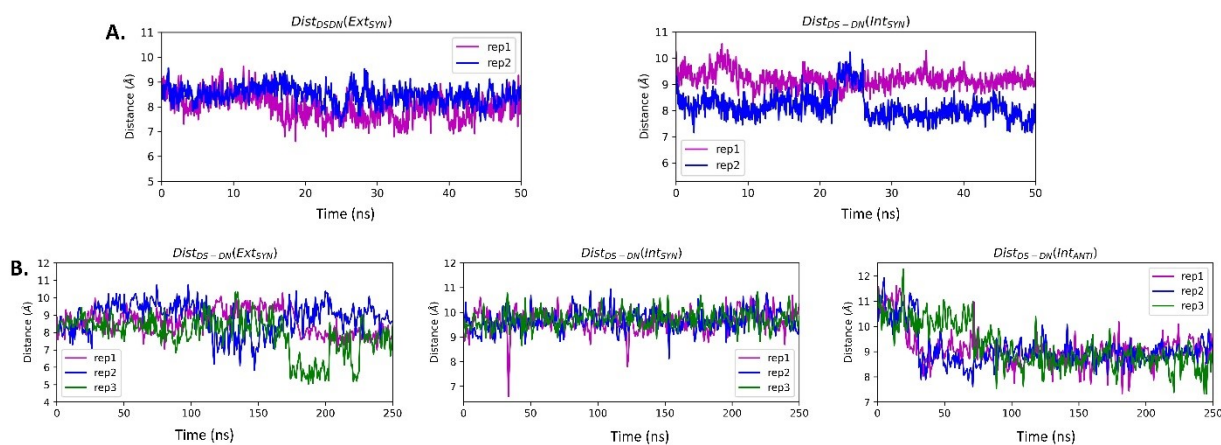

**Figure S3.** DS-DN distances obtained from A. AMOEBA and B. AMBER force field mediated simulations for all the systems.

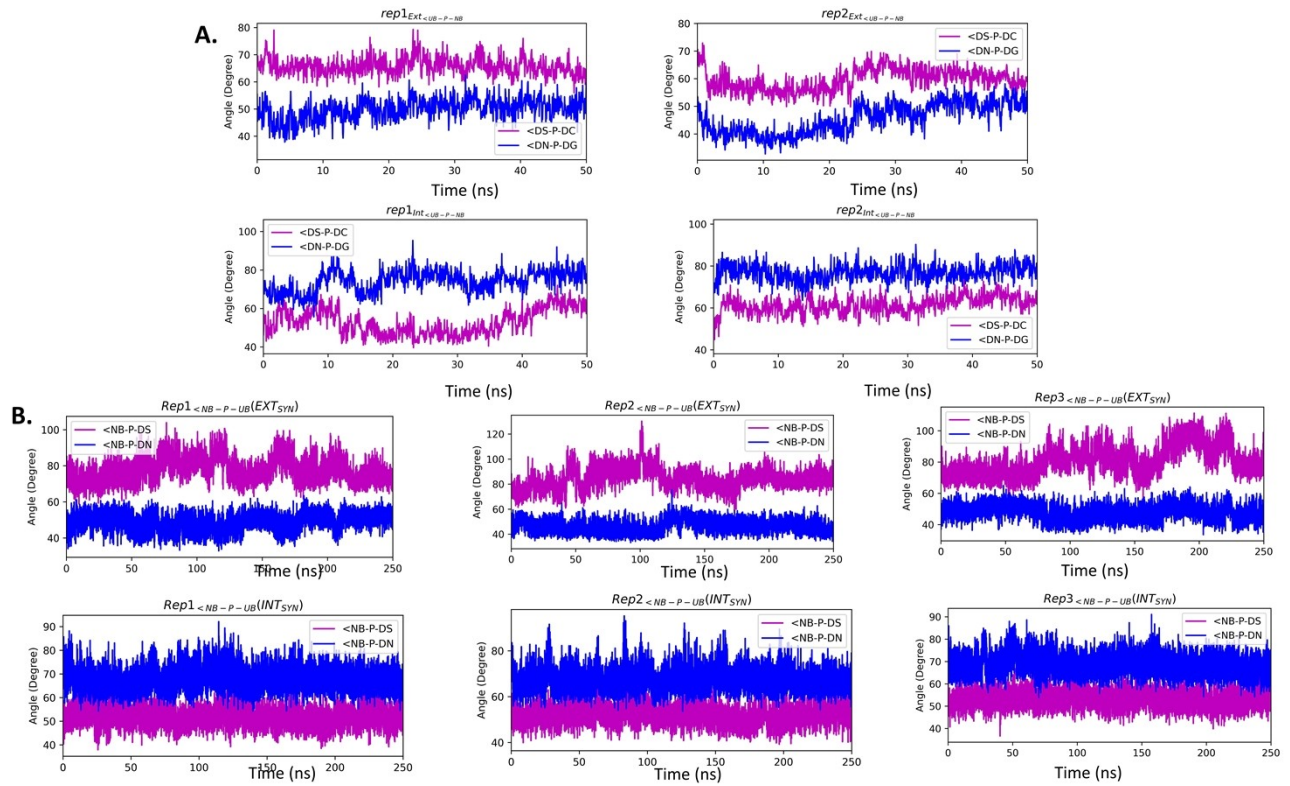

**Figure S4.** <UB-P-NB obtained from A. AMOEBA and B. AMBER force field mediated simulations for all the systems. In the crystal structure, <DS-P-DC and <DN-P-DG are 69.1 degree and 51.1 degree respectively for EXT<sub>SYN</sub> and 51 degree and 68 degree respectively for INT<sub>SYN</sub>.

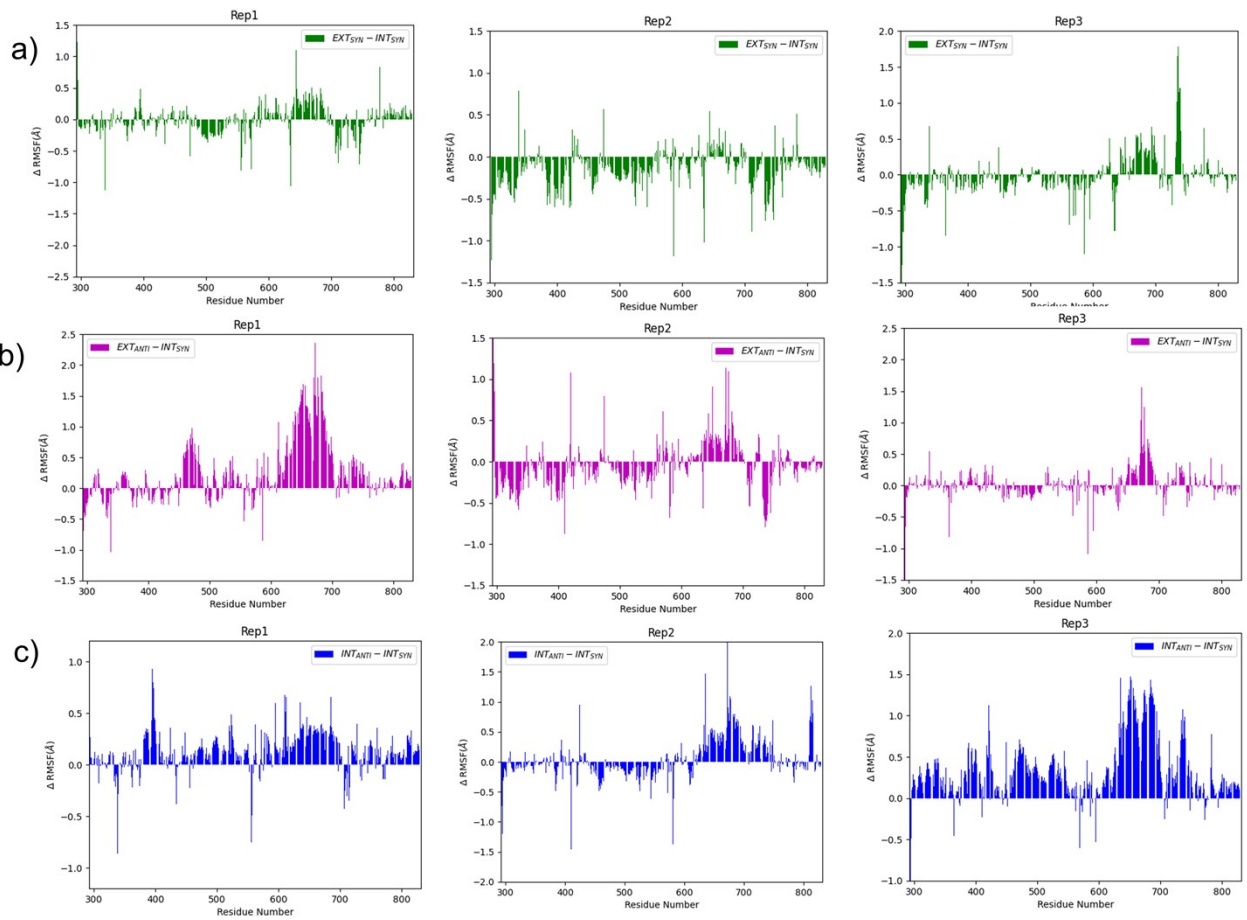

**Figure S5.**  $\Delta$  RMSF of all three replicates (rep1: left, rep2: middle, rep3: right) with respect to  $INT_{SYN}$  conformers obtained from AMBER force field mediated simulations.

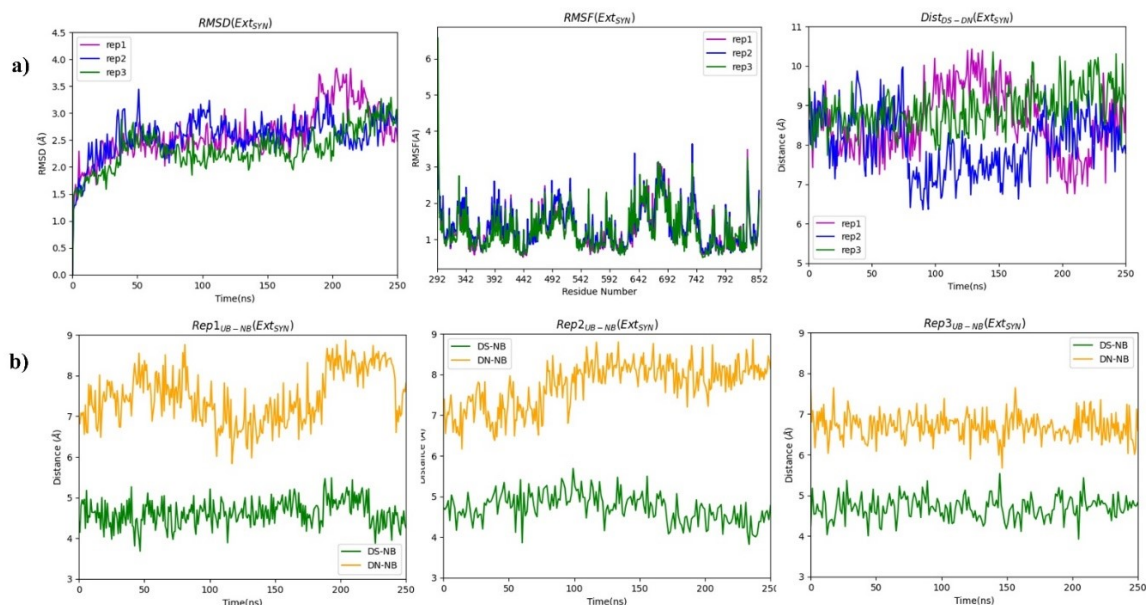

**Figure S6.** a) RMSD, b) RMSF, c) DS-DN distances of all three replicates. d) UB-NB distance of no-hang EXT<sub>SYN</sub> systems obtained from AMBER force field mediated simulations.

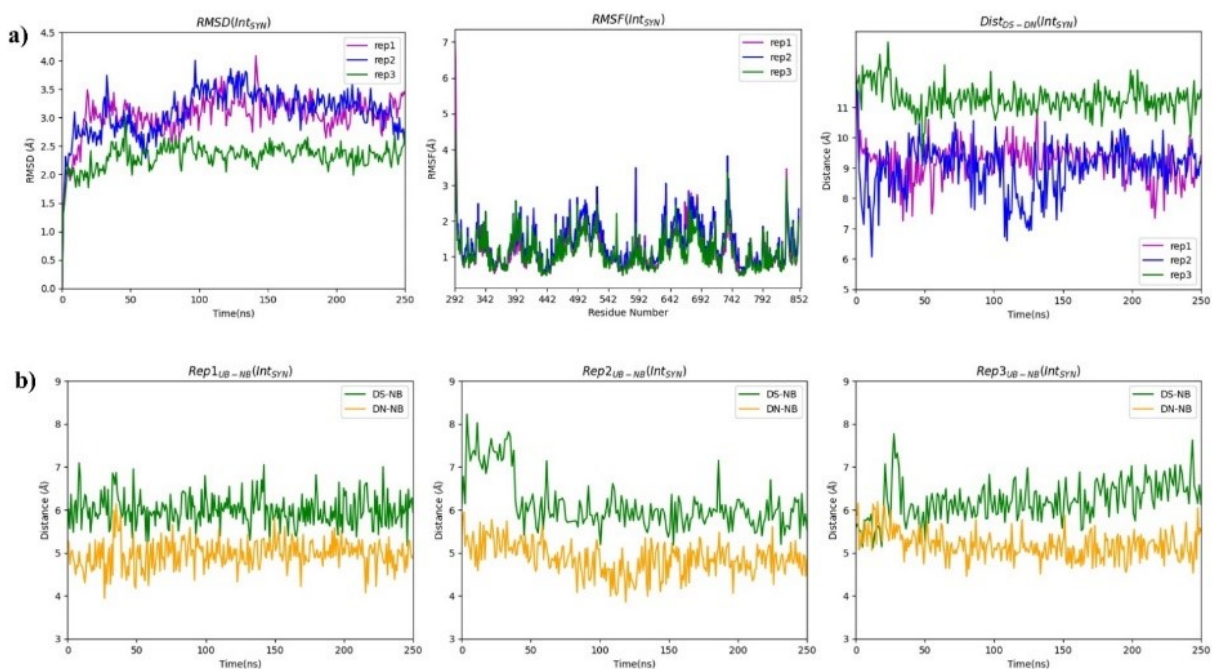

**Figure S7.** a) RMSD, b) RMSF, c) DS-DN distances of all three replicates. d) UB-NB distance of no-hang INT<sub>SYN</sub> systems obtained from AMBER force field mediated simulations.

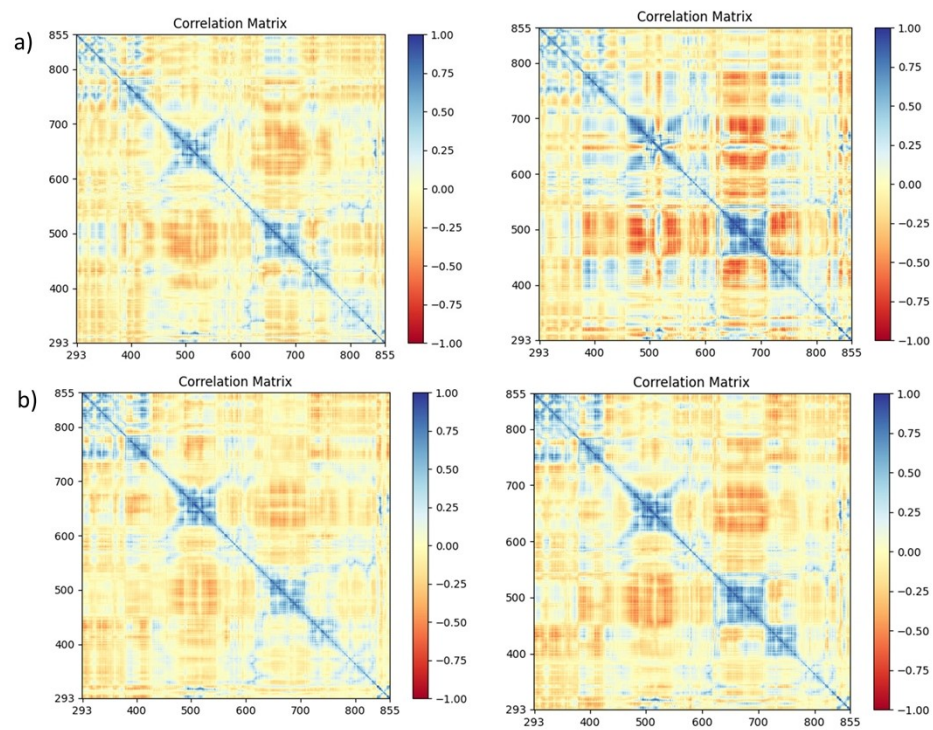

**Figure S8.** Cross correlation matrix for a) EXT and b) INT (SYN: left, ANTI: right) conformers.

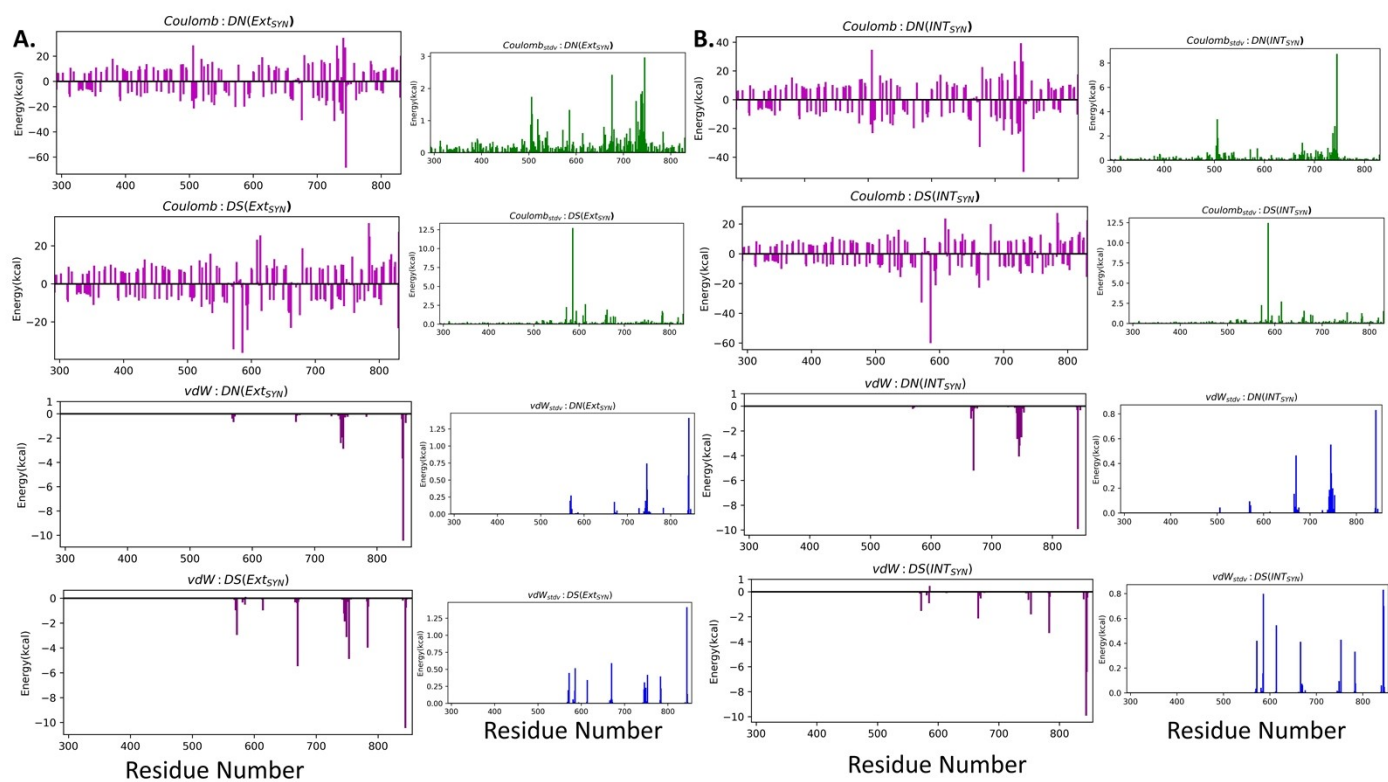

**Figure S9.** Coulomb ( $E_{\text{Coul}}$ ) and vdW ( $E_{\text{vdW}}$ ) interaction energies for DS and DN for A.  $\text{EXT}_{\text{SYN}}$  and B.  $\text{INT}_{\text{SYN}}$ .

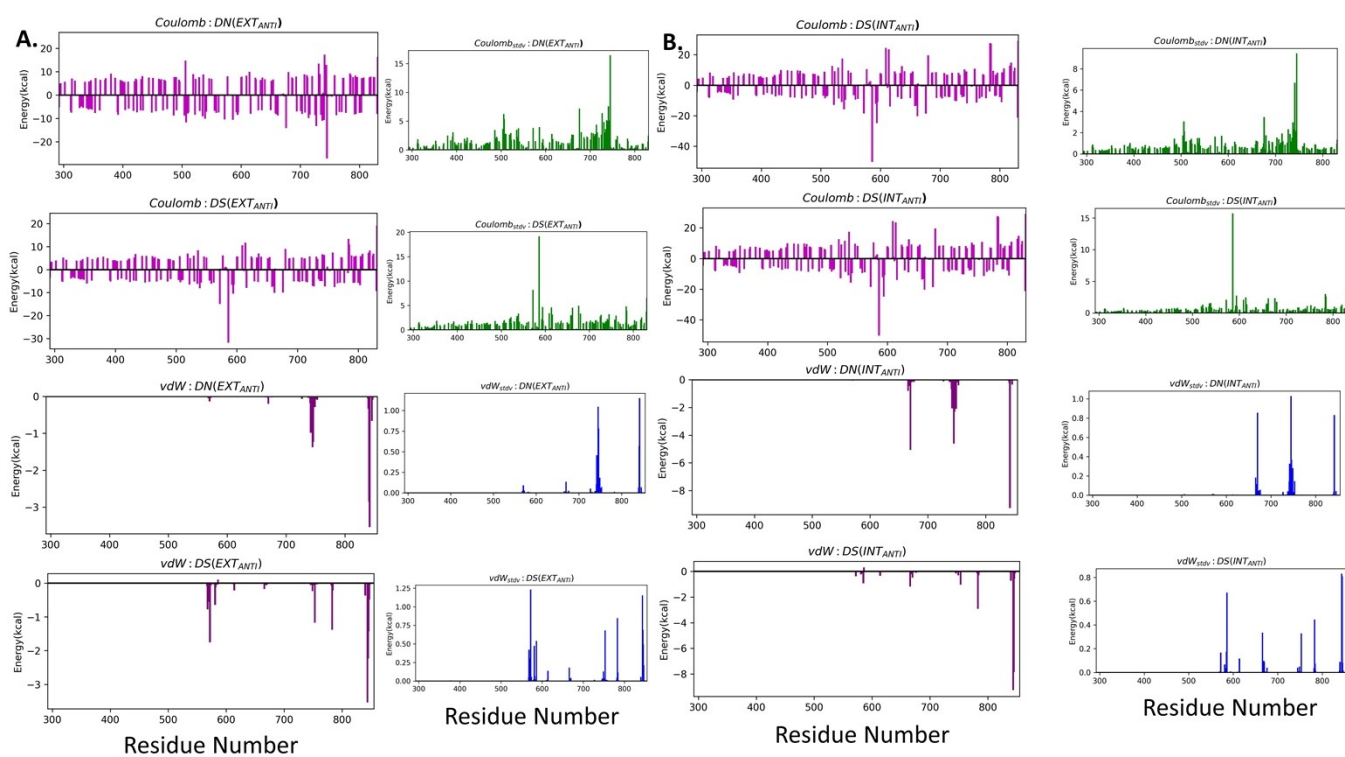

**Figure S10.** Coulomb ( $E_{Coul}$ ) and vdW ( $E_{vdW}$ ) interaction energies for DS and DN for A.  $EXT_{ANTI}$  and B.  $INT_{ANTI}$ .



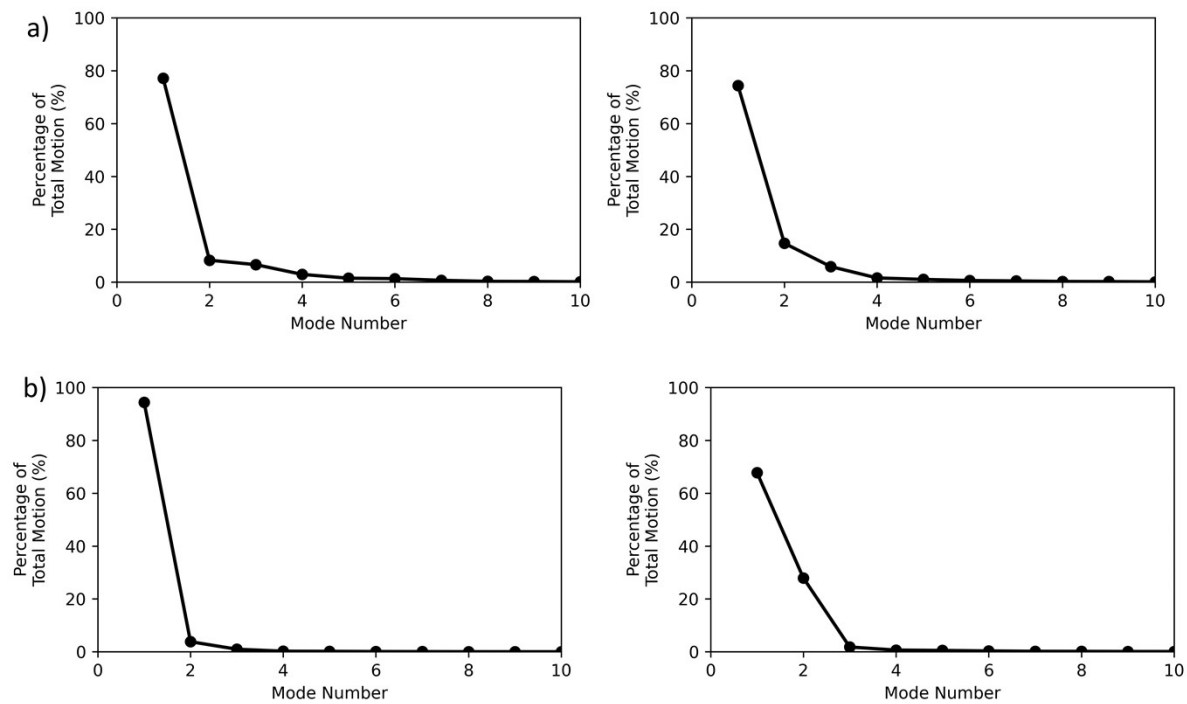

**Figure S11.** Percentage of Total motion (%) for a) EXT<sub>SYN</sub> (left), INT<sub>SYN</sub> (right), b) EXT<sub>ANTI</sub> (left), INT<sub>ANTI</sub> (right) conformers.
